# Supplementary material for: From waste to wealth: chelating polymeric membranes for precious palladium recovery from wastewater
Source: Royal Society of Chemistry journal article supplement (doi:10.1039/d3ta04931k), 2023-01-01
Supplement: d3ta04931k1.pdf [file d3ta04931k1.pdf]

## Supporting Information

From waste to wealth: Chelating polymeric membrane for the precious palladium  
recovery from wastewater

Jamaliah Aburabie<sup>1</sup>, Shabin Mohammed<sup>1</sup>, Anilkumar Kumaran<sup>1</sup>, Raed Hashaikeh<sup>1,\*</sup>

<sup>1</sup> NYUAD Water Research Center, Department of Engineering, New York University Abu Dhabi, Abu Dhabi P.O. Box  
129188, United Arab Emirates

\* Corresponding Author, Email: Raed.Hashaikeh@nyu.edu

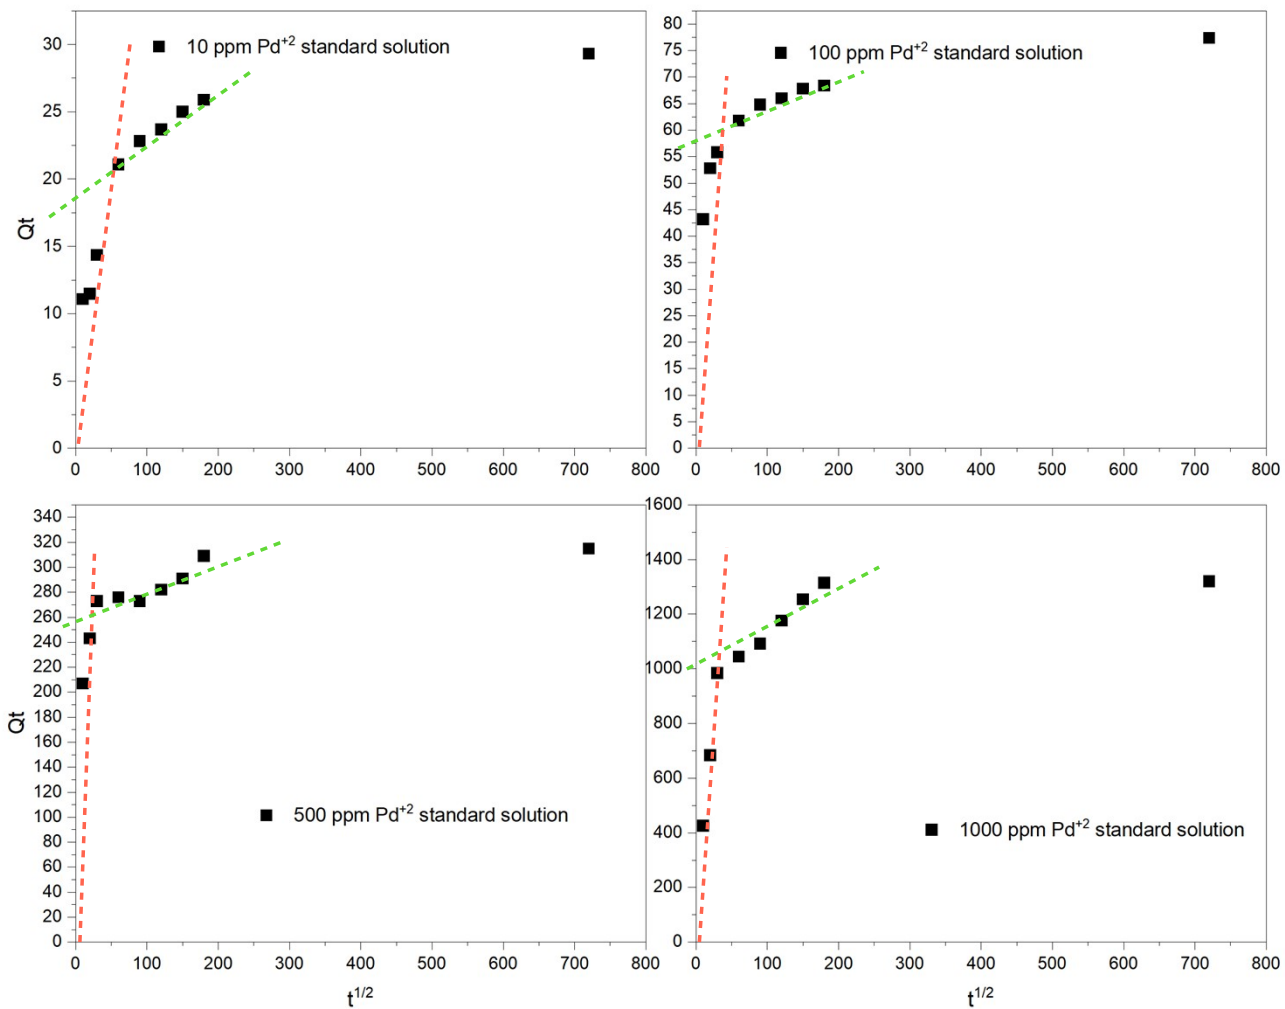

Figure 1S. Intra-particle diffusion model reveals multi linear trends.

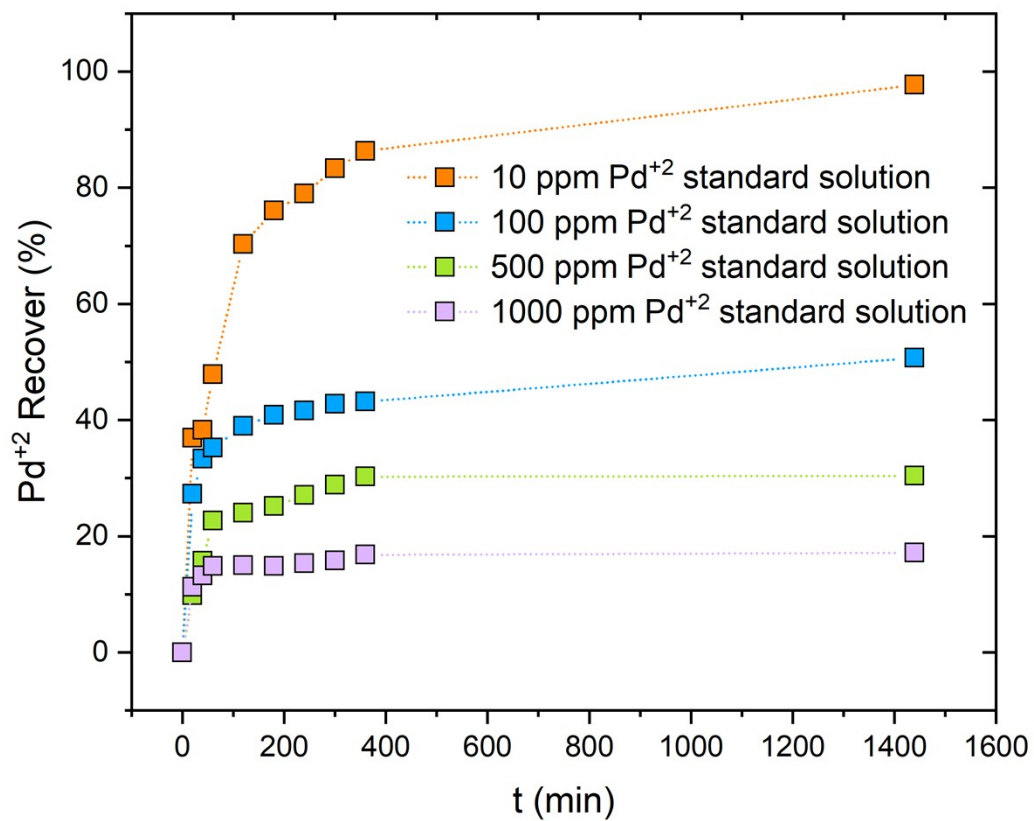

Figure 2S. Palladium recovery % according to batch adsorption for different initial Palladium feed solutions.
